# Supplementary material
Source: PubMed Central journal article supplement (PMC7664707)
Supplement: aud-41-442-s001.pdf [file aud-41-442-s001.pdf]

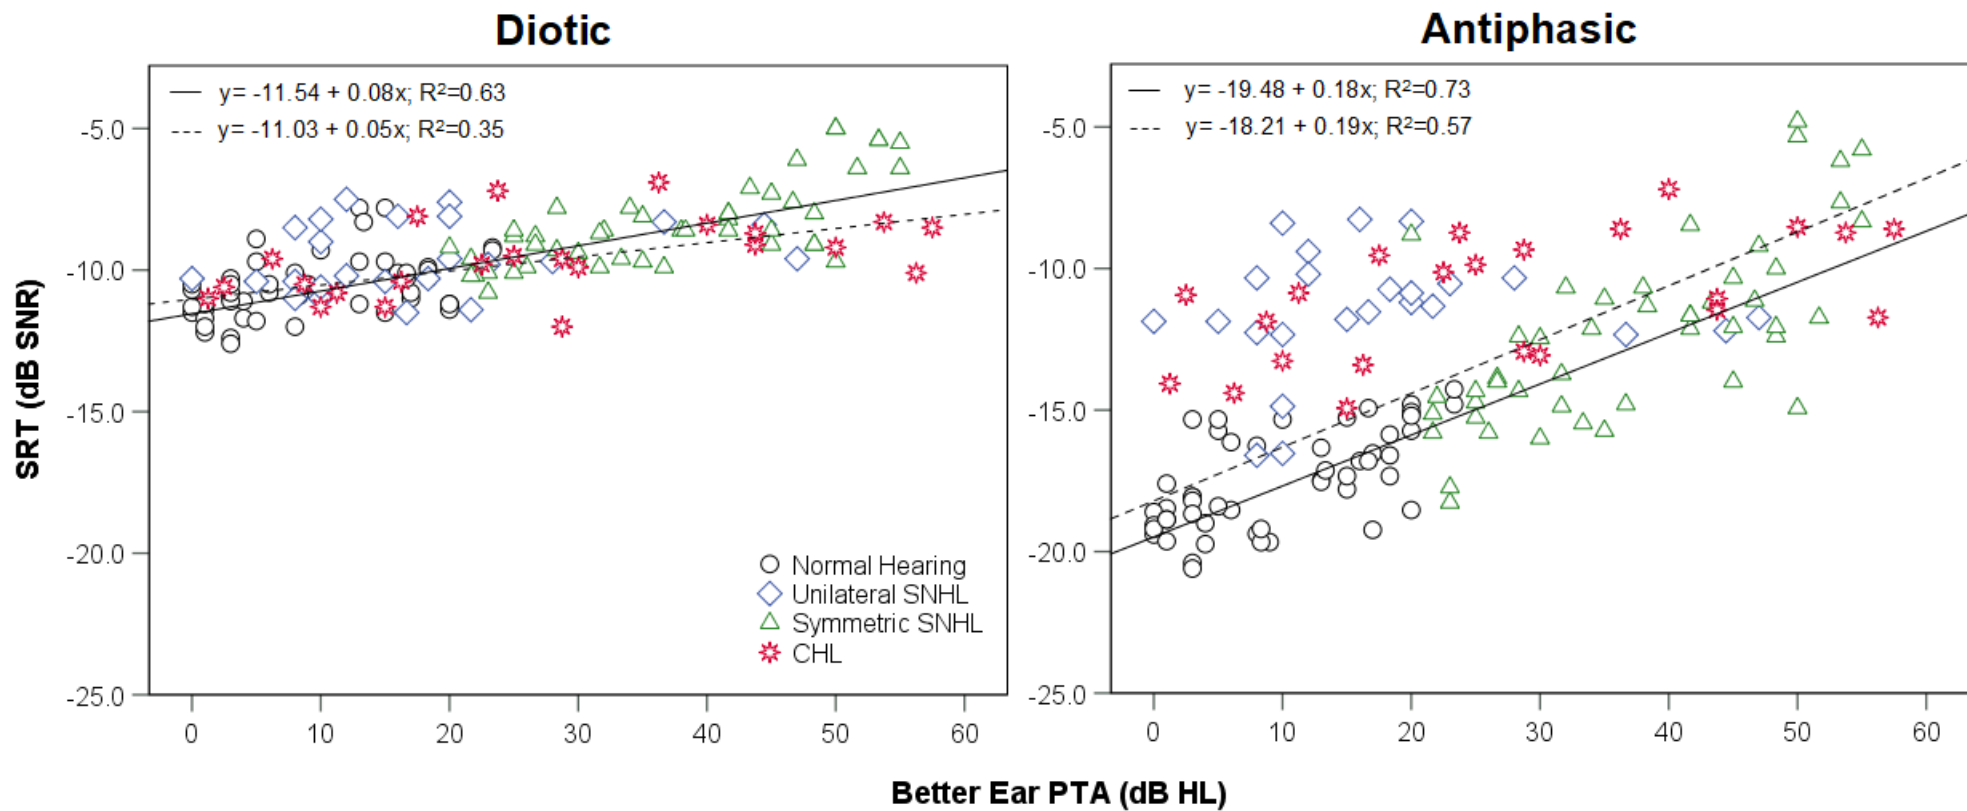

**Figure. Correlations of the diotic and antiphase DIN to better ear PTA.** Solid lines are regression lines fitted to normal hearing and symmetric SNHL group data. Dashed lines are regression lines fitted to normal hearing and CHL group data. SRT; speech reception threshold, dB; decibel, SNR; signal to noise ratio, HL; hearing level.
